# Supplementary material for: Developmental control of gene copy number by repression of replication initiation and fork progression
Source: HighWire-hosted journal article supplement (doi:10.1101/gr.126003.111), 2011-11-16
Supplement: Sher_et_al_Supplemental_Material_revised.pdf [file Sher_et_al_Supplemental_Material_revised.pdf]

## Supplemental Figure legends

**Supplementary Figure 1.** The following data are shown for the entire chromosome arms *X*, *2L*, *2R*, *3L*, and *3R*. *OrR* CGH, *OrR* RNA Sequencing, *OrR* RNA Pol II ChIP-chip, *OrR* H3K27me3 ChIP-chip, and *OrR* ORC ChIP-Seq. Locations of euchromatic under-replicated regions are marked by vertical light green bars, and heterochromatic under-replicated regions (5 additional loci) are marked with vertical light blue bars. Data are normalized as explained in Fig. 1 in main text.

**Supplementary Figure 2.** Quantitative PCR of eleven most under-replicated genomic loci confirms aCGH data. qPCR was performed with primers against 11 under-replicated loci, normalized to a control fully replicated locus, corroborating levels of under-replication as indicated by probe closest to the qPCR primer present on the aCGH array.

**Supplementary Figure 3.** Comparison of the transcription properties of the regions that are under-replicated in salivary glands to the corresponding regions in dividing cell culture lines. **A**, Each under-replicated region was divided into 100 windows and each flanking region (the length of half the corresponding under-replicated region) was divided into 50 windows. The mean expression value of each gene (RPKM) is shown across each window. The KC RNA-Seq data are those from the modENCODE consortium, which is modENCODE\_2593 from the web site <http://intermine.modencode.org/release-22/objectDetails.do?id=1166000188>. In the bottom panel the exon densities within the windows are shown. The 34 under-replicated domains are shown in the same order vertically in each panel. **B**, GO enrichment of genes in the under-replicated regions, number of genes and p values for each category.

**Supplemental Figure 4.** Comparison of H3K27me3 ChIP-chip normalized to either input DNA or to control IgG pulldown. The identical results indicate that either can be used for normalization of the data with similar results.

**Supplementary Figure 5.** Comparison between ChIP-chip and ChIP-Seq results for *OrR* ORC2 binding sites. Shown is the proximal region of 2L. In both experiments, the under-replicated regions are sparse in ORC2 binding sites. Plotted is the mean probe intensity.

**Supplementary Figure 6. A,** Ploidy levels of *orc1* mutants and heterozygous sibling controls were quantified using DAPI microdensitometry. The intensity of DAPI staining was measured relative to diploid cells to calculate their ploidy. **B,** The following data are shown for chromosome arms *X*, 2L, 2R, 3L, and 3R. *OrR* aCGH, *orc2<sup>k43</sup>/Df(3R)Exel6288* aCGH, *orc2<sup>k43</sup>/Df(3R)Exel6171* aCGH, *orc1* aCGH. Plotted is the mean probe intensity.

**Supplementary Figure 7.** Quantitative PCR of four under-replicated genomic loci confirms *SuUR* mutant aCGH data. qPCR was performed with primers against four under-replicated loci, normalized to a control fully replicated locus, corroborating recovery of replication in the *SuUR* mutant, as indicated by aCGH.

**Supplementary Figure 8.** The following data are shown for chromosome arms *X*, 2L, 2R, 3L, and 3R. *OrR* aCGH, *SuUR* mutant aCGH, *SuUR* mutant ORC ChIP-Seq, *SuUR* mutant RNA Sequencing and *SuUR* mutant H3K27me3 ChIP-chip. Locations of euchromatic under-replicated regions are marked by vertical light green bars, and heterochromatic under-replicated regions (5 additional loci) are marked with vertical light blue bars. Data are normalized as described in figures in main text.

**Supplementary Figure 9.** Comparison between ChIP-chip and ChIP-Seq results for *SuUR* mutant ORC2 binding sites. Shown is the proximal region of 2L. Plotted is the mean probe intensity.

**Supplementary Figure 10.** Increased replication fork progression in *SuUR* mutants is not due to developmental delays in oogenesis. Egg chambers stages 8-14 were quantified in *OrR*, *SuUR* mutants, or the heterozygote *SuUR/TM3*, with frequency of occurrence plotted on y axis. At least 250 egg chambers were counted from at least four different ovaries.
